# Supplementary material for: Nirmatrelvir-Ritonavir and Symptoms in Adults With Postacute Sequelae of SARS-CoV-2 Infection: The STOP-PASC Randomized Clinical Trial
Source: PubMed Central journal article supplement — JAMA Intern Med. 2024 Jun 7;184(9):1024–34. doi: 10.1001/jamainternmed.2024.2007 (PMC11161857; doi:10.1001/jamainternmed.2024.2007), 2024-06-07
Supplement: jamainternmed-e242007-s004.pdf [file jamainternmed-e242007-s004.pdf]

## Data Sharing Statement

Geng. Nirmatrelvir-Ritonavir and Symptoms in Adults With Postacute Sequelae of SARS-CoV-2 Infection. *JAMA Intern Med.* Published June 07, 2024.

doi:10.1001/jamainternmed.2024.2007

### Data

**Data available:** No

### Additional Information

**Explanation for why data not available:** Additional analyses in progress. Data sharing planned pending future publication(s).
